# Supplementary material for: Phosphating core–shell graphdiyne/CuI/Cu3P S-scheme heterojunction confirmed with in situ XPS characterization for efficient photocatalytic hydrogen production
Source: Royal Society of Chemistry journal article supplement (doi:10.1039/d3cy00850a), 2023-01-01
Supplement: d3cy00850a1.pdf [file d3cy00850a1.pdf]

## Supporting Information

### Phosphating core-shell graphdiyne/CuI/Cu<sub>3</sub>P S-scheme heterojunction confirmed with in situ XPS characterization for efficient photocatalytic hydrogen production

Jie He § , Xinyu Miao § , Youlin Wu, Zhiliang Jin\*

*School of Chemistry and Chemical Engineering, Ningxia Key Laboratory of Solar Chemical  
Conversion Technology, Key Laboratory for Chemical Engineering and Technology, State Ethnic  
Affairs Commission, North Minzu University, Yinchuan 750021, P.R.China*

Corresponding author: zl-jin@nun.edu.cn (Z. L. Jin); § Equal contribution

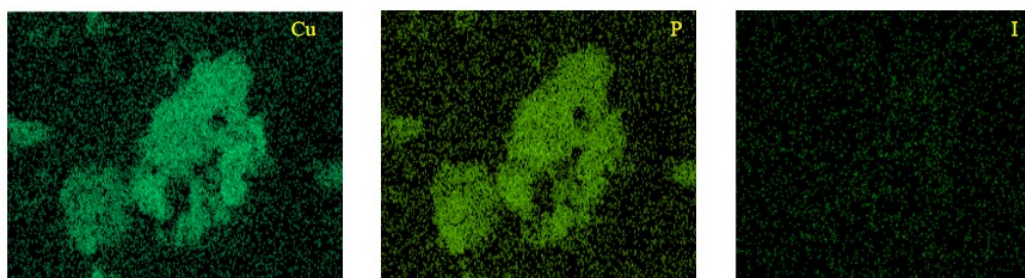

Fig. S1 (a) SEM mapping smages of Cu<sub>3</sub>P.

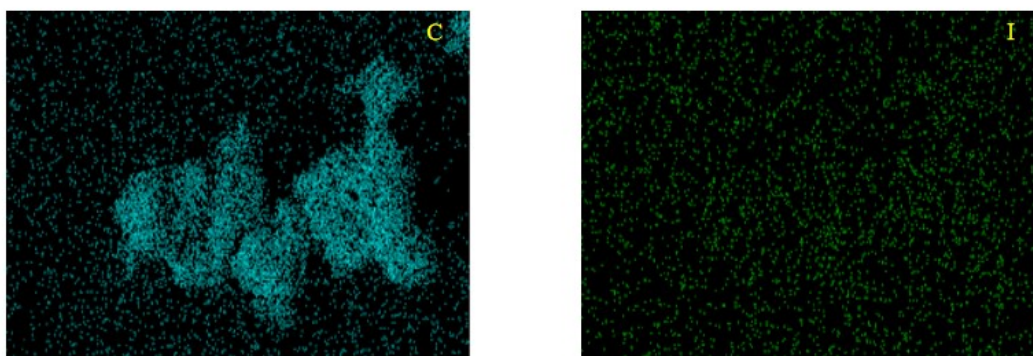

Fig. S1 (b) SEM mapping smages of GDY.

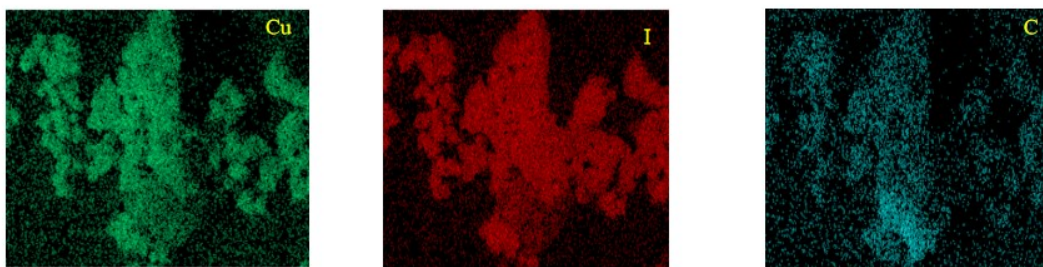

Fig. S1 (c) SEM mapping smages of GC.

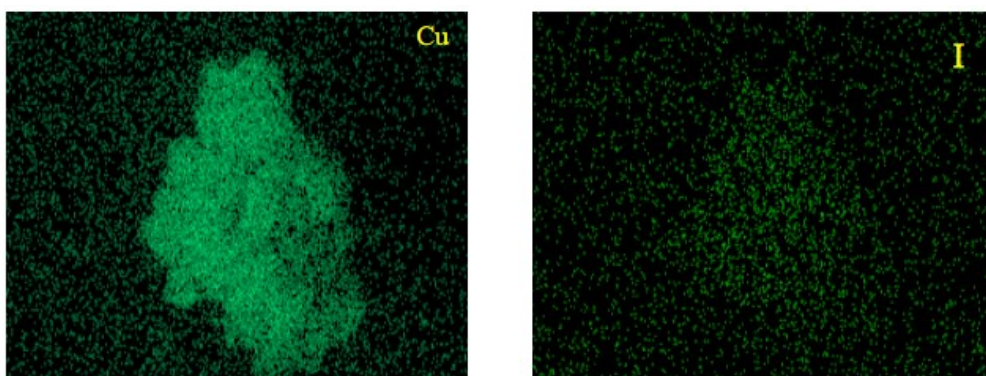

Fig. S1 (d) SEM mapping smages of CuI/Cu<sub>3</sub>P.

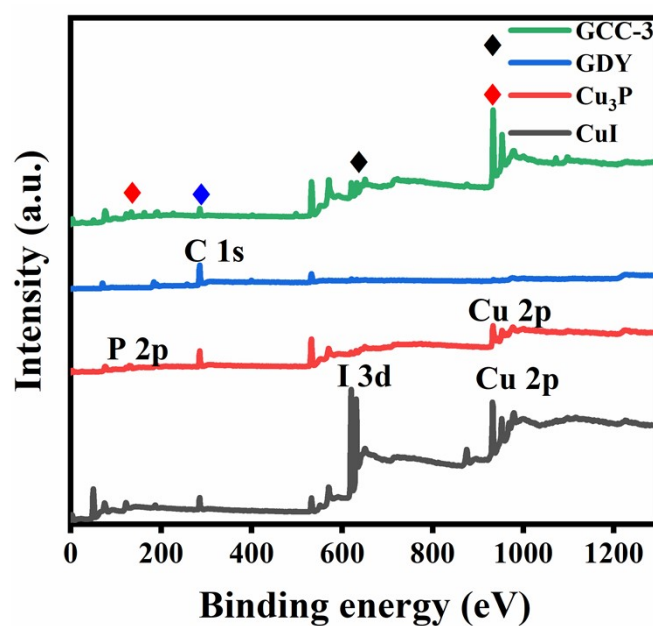

Fig. S2 XPS full spectrum of GDY, CuI, Cu<sub>3</sub>P, GCC-3.

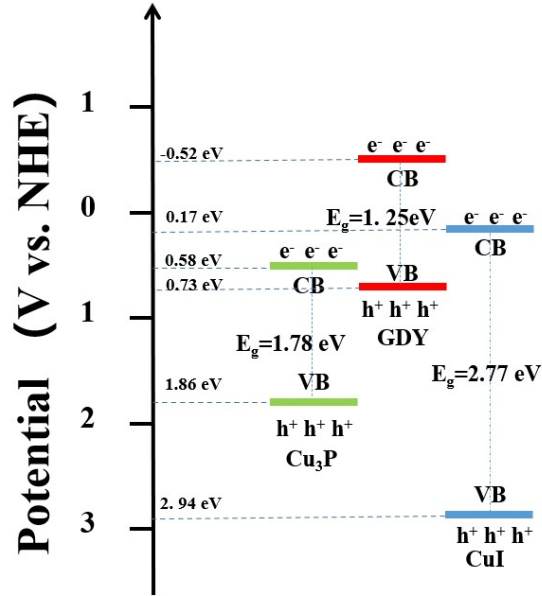

Fig. S3 band gap structures of GDY, Cu<sub>3</sub>P and CuI.

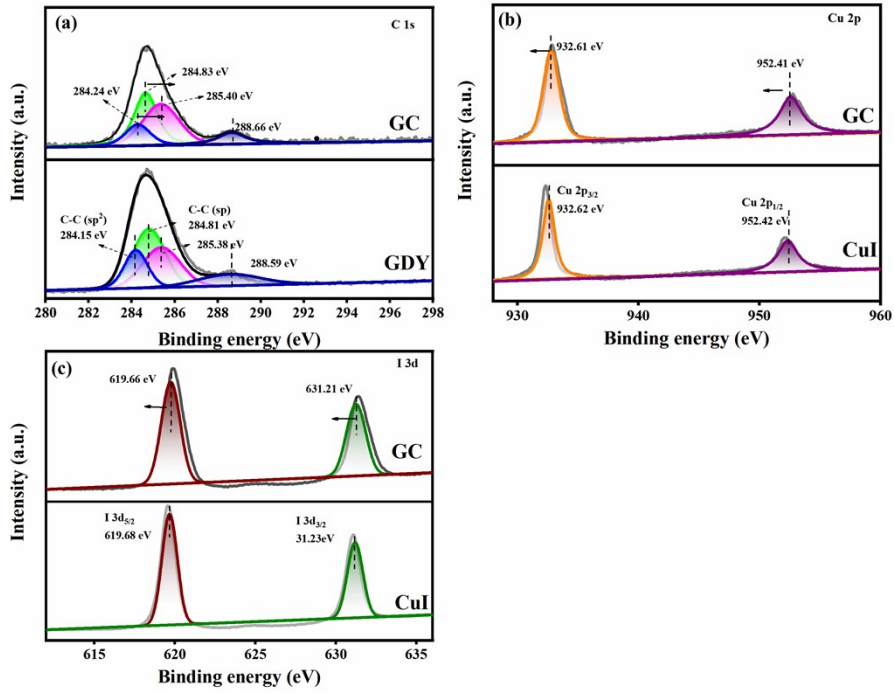

Fig. S4 XPS spectra of (a) C 1s; (b) Cu 2p; (c) I 3d.
